# Supplementary material for: Nutrient composition of Chenopodium formosanum Koidz. bran: Fractionation and bioactivity of its soluble active polysaccharides
Source: PeerJ. 2022 May 25;10:e13459. doi: 10.7717/peerj.13459 (PMC9147384; doi:10.7717/peerj.13459)
Supplement: Supplemental Information 6 [file peerj-10-13459-s006.xlsx]

## Sheet: 工作表1
con.	CF-1		CF-2		CF-3		Trolox
0.01	16.85	1.12	13.05	0.92	25.28	0.55	3.58	0.82
0.05	31.9	1.12	52.41	0.06	37	0.84	6.27	0.82
0.1	44.27	0.82	55.42	1.59	46.34	0.84	10.39	0.82
0.5	58.78	0.82	56.23	0.92	63	0.84	20.61	0.82
1	58.96	0.82	59.04	1.21	67.22	0.64	38.17	0.54
5	61.65	0.82	62.45	0.92	71.98	0.6	57.53	0.67
10	62.37	1.08	63.86	0.06	77.11	0.84	57.53	0.72
