# Supplementary material for: Nutrient composition of Chenopodium formosanum Koidz. bran: Fractionation and bioactivity of its soluble active polysaccharides
Source: PeerJ. 2022 May 25;10:e13459. doi: 10.7717/peerj.13459 (PMC9147384; doi:10.7717/peerj.13459)
Supplement: Supplemental Information 7 [file peerj-10-13459-s007.xlsx]

## Sheet: 工作表1
con.	CF-1		CF-2		CF-3		EDTA
0.01	0	0	0	0	0	0	3.16	0.7
0.05	0	0	3.38	0.38	0	0	12.27	0.19
0.1	0.63	0.57	4.01	0.22	0.65	0.23	34.11	0.25
0.5	2.63	0.38	10.78	0.57	5.45	0.39	74.26	0.49
1	4.76	0.22	14.29	0.75	8.43	0.23	89.16	0.62
5	8.65	0.38	16.04	0.57	13.88	0.45	99.34	0.07
10	10.4	0.43	22.18	0.38	19.97	0.59	99.47	0.07
