# Supplementary material for: Nutrient composition of Chenopodium formosanum Koidz. bran: Fractionation and bioactivity of its soluble active polysaccharides
Source: PeerJ. 2022 May 25;10:e13459. doi: 10.7717/peerj.13459 (PMC9147384; doi:10.7717/peerj.13459)
Supplement: Supplemental Information 8 [file peerj-10-13459-s008.xlsx]

## Sheet: CF-1
Fraction Number	O.D. 490 nm	O.D. 280 nm
1	0.02	0.02
3	0.019	0.019
5	0.019	0.01
7	0.021	0.01
9	0.02	0.009
11	0.024	0.01
13	0.026	0.009
15	0.044	0.009
17	0.039	0.009
19	0.038	0.009
21	0.034	0.011
23	0.033	0.011
25	0.032	0.014
27	0.042	0.024
29	0.078	0.032
31	0.144	0.033
33	0.173	0.109
35	0.134	0.221
37	0.048	0.071
39	0.018	0.027
41	0.018	0.018
43	0.018	0.018
45	0.016	0.01
47	0.019	0.011
49	0.012	0.012

## Sheet: CF-2
Fraction Number	O.D. 490 nm	O.D. 280 nm
1	0.012	0.012
3	0.013	0.013
5	0.009	0.009
7	0.01	0.01
9	0.012	0.012
11	0.006	0.009
13	0.009	0.009
15	0.008	0.008
17	0.015	0.015
19	0.009	0.009
21	0.011	0.011
23	0.007	0.009
25	0.019	0.011
27	0.049	0.015
29	0.093	0.041
31	0.157	0.093
33	0.23	0.194
35	0.214	0.303
37	0.086	0.169
39	0.026	0.044
41	0.016	0.021
43	0.009	0.012
45	0.008	0.008
47	0.007	0.009
49	0.006	0.008

## Sheet: CF-3
Fraction Number	O.D. 490 nm	O.D. 280 nm
1	0.01	0.01
3	0.006	0.006
5	0.007	0.007
7	0.005	0.005
9	0.007	0.007
11	0.006	0.006
13	0.008	0.009
15	0.008	0.007
17	0.009	0.008
19	0.008	0.008
21	0.012	0.012
23	0.088	0.007
25	0.222	0.009
27	0.305	0.011
29	0.465	0.013
31	0.339	0.055
33	0.251	0.114
35	0.095	0.07
37	0.014	0.018
39	0.009	0.009
41	0.01	0.01
43	0.009	0.009
45	0.009	0.009
47	0.009	0.009
49	0.007	0.007

## Sheet: CF-4
Fraction Number	O.D. 490 nm	O.D. 280 nm
1	0.03	0.018
3	0.014	0.014
5	0.014	0.008
7	0.009	0.009
9	0.009	0.007
11	0.015	0.007
13	0.01	0.007
15	0.009	0.009
17	0.011	0.013
19	0.01	0.01
21	0.009	0.011
23	0.013	0.015
25	0.025	0.02
27	0.046	0.021
29	0.06	0.022
31	0.075	0.03
33	0.06	0.054
35	0.04	0.068
37	0.018	0.04
39	0.01	0.015
41	0.008	0.008
43	0.01	0.005
45	0.013	0.005
47	0.009	0.005
49	0.011	0.004
